# Supplementary material for: Innate and adaptive AAV-mediated immune responses in a mouse model of Duchenne muscular dystrophy
Source: PubMed Central journal article supplement — Mol Ther Methods Clin Dev. 2023 Jun 12;30:90–102. doi: 10.1016/j.omtm.2023.06.002 (PMC10512012; doi:10.1016/j.omtm.2023.06.002), 2023-06-12
Supplement: mmc1.pdf [file mmc1.pdf]

**OMTM, Volume 30**

**Supplemental information**

**Innate and adaptive AAV-mediated immune  
responses in a mouse model  
of Duchenne muscular dystrophy**

**Michael R. Emami, Alejandro Espinoza, Courtney S. Young, Feiyang Ma, Philip K. Farahat, Philip L. Felgner, Jeffrey S. Chamberlain, Xiangmin Xu, April D. Pyle, Matteo Pellegrini, S. Armando Villalta, and Melissa J. Spencer**

**Table S1. HCPM mean concentration (ng/mL) of anti-AAV and anti-transgene IgG and IgM for AAV9-Cas9, AAV9-Cas9-FS and AAV9- $\mu$ DYS dosed *mdx* mice.**

| Vector    | Antigen  | Immunoglobulin | Pre      | SD       | N        | Post-1 2wks | SD        | N         | Post-1 4wks | SD        | N         | Post-2 2wks | SD        | N         | Post-2 6wks | SD         | N         |         |   |
|-----------|----------|----------------|----------|----------|----------|-------------|-----------|-----------|-------------|-----------|-----------|-------------|-----------|-----------|-------------|------------|-----------|---------|---|
| Cas9-FS   | AAV9     | IgG            | 3.55E+04 | 15216.6  | 5        | 1.24E+05    | 17843.5   | 6         | 1.49E+05    | 31186.4   | 6         | 1.99E+05    | 35224.7   | 6         | 1.85E+05    | 19260.2    | 6         |         |   |
| Cas9      |          |                | 3.16E+04 | 5768.0   | 3        | 1.20E+05    | 29618.6   | 5         | 1.51E+05    | 33866.2   | 5         | 1.94E+05    | 42554.4   | 5         | 1.82E+05    | 37596.3    | 5         |         |   |
| $\mu$ DYS |          |                | 2.33E+04 | 17608.4  | 4        | 1.16E+05    | 21340.4   | 6         | 1.71E+05    | 20931.4   | 6         | 1.90E+05    | 31503.8   | 6         | 1.86E+05    | 19356.2    | 6         |         |   |
| Combined  |          |                | 3.05E+04 | 14334.7  | 12       | 1.20E+05    | 21743.7   | 17        | 1.57E+05    | 28828.1   | 17        | 1.94E+05    | 34125     | 17        | 1.84E+05    | 24265.1    | 17        |         |   |
| Cas9-FS   |          |                | IgM      | 9.28E+04 | 74479.3  | 5           | 1.59E+06  | 1483783.8 | 6           | 3.46E+05  | 410199.8  | 6           | 1.33E+06  | 1332001.4 | 6           | 4.35E+05   | 330423.7  | 6       |   |
| Cas9      |          |                |          | 1.15E+05 | 68414.9  | 3           | 9.97E+05  | 792940.9  | 5           | 4.75E+05  | 337235.5  | 5           | 5.02E+05  | 283709.0  | 5           | 5.88E+05   | 250517.3  | 5       |   |
| $\mu$ DYS |          | 1.79E+05       |          | 84396.0  | 4        | 7.83E+05    | 441980.4  | 6         | 5.40E+05    | 531889.9  | 6         | 5.34E+05    | 613854.7  | 6         | 3.22E+06    | 6114362.7  | 6         |         |   |
| Combined  |          | 1.27E+05       |          | 79770.6  | 12       | 1.13E+06    | 1017145.6 | 17        | 4.53E+05    | 420357.76 | 17        | 8.07E+05    | 923925.86 | 17        | 1.46E+06    | 3677581.57 | 17        |         |   |
| Cas9-FS   |          | AAV2           |          | IgG      | 3.53E+04 | 15064.2     | 5         | 1.34E+05  | 62356.8     | 6         | 1.77E+05  | 42459.9     | 6         | 2.81E+05  | 68983.4     | 6          | 2.32E+05  | 46160.6 | 6 |
| Cas9      |          |                |          |          | 3.18E+04 | 5638.0      | 3         | 1.36E+05  | 68404.1     | 5         | 1.69E+05  | 66167.9     | 5         | 2.70E+05  | 62558.2     | 5          | 2.27E+05  | 53849.1 | 5 |
| $\mu$ DYS |          |                | 2.83E+04 |          | 9891.3   | 4           | 1.39E+05  | 74101.1   | 6           | 1.83E+05  | 83647.9   | 6           | 2.54E+05  | 75051.0   | 6           | 2.22E+05   | 57682.4   | 6       |   |
| Combined  |          |                | 3.21E+04 |          | 11176    | 12          | 1.36E+05  | 64068.6   | 17          | 1.76E+05  | 62247.9   | 17          | 2.68E+05  | 66023.8   | 17          | 2.27E+05   | 49477.57  | 17      |   |
| Cas9-FS   | IgM      |                | 8.97E+05 |          | 652717.9 | 5           | 8.87E+05  | 503360.8  | 6           | 3.70E+05  | 376646.9  | 6           | 1.50E+06  | 1506907.9 | 6           | 4.89E+05   | 341335.7  | 6       |   |
| Cas9      |          |                | 2.34E+05 |          | 112934.7 | 3           | 1.17E+06  | 1402548.1 | 5           | 1.21E+06  | 1758233.4 | 5           | 9.52E+05  | 1116181.1 | 5           | 1.23E+06   | 1002817.2 | 5       |   |
| $\mu$ DYS |          | 1.43E+05       | 103086.0 | 4        | 5.57E+05 | 583816.1    | 6         | 5.71E+05  | 413113.8    | 6         | 4.28E+05  | 439868.8    | 6         | 1.23E+07  | 28591416.1  | 6          |           |         |   |
| Combined  |          | 4.80E+05       | 545092.5 | 12       | 8.53E+05 | 861203.3    | 17        | 6.89E+05  | 1000190.8   | 17        | 9.59E+05  | 1138073.3   | 17        | 4.87E+06  | 16963075.8  | 17         |           |         |   |
| Cas9-FS   |          | AAV8           | IgG      | 3.79E+04 | 15016.1  | 5           | 1.62E+05  | 103102.3  | 6           | 2.21E+05  | 90622.0   | 6           | 3.00E+05  | 80229.3   | 6           | 2.84E+05   | 74333.3   | 6       |   |
| Cas9      |          |                |          | 3.18E+04 | 5434.3   | 3           | 1.34E+05  | 84193.8   | 5           | 1.88E+05  | 82500.8   | 5           | 3.16E+05  | 63761.7   | 5           | 2.75E+05   | 57873.2   | 5       |   |
| $\mu$ DYS | 2.32E+04 |                |          | 17538.0  | 4        | 1.54E+05    | 121210.8  | 6         | 2.69E+05    | 81400.0   | 6         | 3.24E+05    | 55877.7   | 6         | 3.12E+05    | 58230.1    | 6         |         |   |
| Combined  | 3.15E+04 |                |          | 14651.4  | 12       | 1.51E+05    | 99136.2   | 17        | 2.28E+05    | 86540.9   | 17        | 3.13E+05    | 64135.4   | 17        | 2.91E+05    | 62423      | 17        |         |   |
| Cas9-FS   | IgM      |                |          | 3.83E+05 | 206258.8 | 5           | 1.89E+06  | 1326187.0 | 6           | 5.95E+05  | 848117.5  | 6           | 2.66E+06  | 2677867.9 | 6           | 1.17E+06   | 1586331.2 | 6       |   |
| Cas9      |          |                |          | 1.74E+05 | 48389.4  | 3           | 1.03E+06  | 843659.1  | 5           | 6.62E+05  | 760626.2  | 5           | 1.21E+06  | 1156726.7 | 5           | 1.22E+06   | 756198.1  | 5       |   |
| $\mu$ DYS |          | 2.00E+05       | 49800.8  | 4        | 1.09E+06 | 927154.3    | 6         | 9.36E+05  | 892042.2    | 6         | 1.16E+06  | 1154644.8   | 6         | 5.61E+06  | 10446274.2  | 6          |           |         |   |
| Combined  |          | 2.69E+05       | 163266.9 | 12       | 1.36E+06 | 1078257.4   | 17        | 7.35E+05  | 801383.8    | 17        | 1.71E+06  | 1875019.9   | 17        | 2.75E+06  | 6306277.9   | 17         |           |         |   |
| Cas9-FS   |          | AAVMYO         | IgG      | 3.63E+04 | 14961.5  | 5           | 1.74E+05  | 32714.5   | 6           | 1.88E+05  | 44831.3   | 6           | 2.32E+05  | 39692.5   | 6           | 2.27E+05   | 27347.5   | 6       |   |
| Cas9      |          |                |          | 3.17E+04 | 5547.8   | 3           | 1.71E+05  | 35275.6   | 5           | 2.03E+05  | 44063.7   | 5           | 2.43E+05  | 46704.1   | 5           | 2.30E+05   | 44779.4   | 5       |   |
| $\mu$ DYS | 2.32E+04 |                |          | 17479.2  | 4        | 1.82E+05    | 31621.3   | 6         | 2.37E+05    | 33275.7   | 6         | 2.46E+05    | 33380.4   | 6         | 2.49E+05    | 27136.4    | 6         |         |   |
| Combined  | 3.08E+04 |                |          | 14318    | 12       | 1.76E+05    | 31325.4   | 17        | 2.09E+05    | 43909.8   | 17        | 2.40E+05    | 37701.1   | 17        | 2.36E+05    | 32700.8    | 17        |         |   |
| Cas9-FS   | IgM      |                |          | 3.70E+05 | 309935.1 | 5           | 2.63E+06  | 1926935.2 | 6           | 7.43E+05  | 977233.5  | 6           | 2.16E+06  | 2140910.0 | 6           | 7.77E+05   | 569107.0  | 6       |   |
| Cas9      |          |                |          | 1.93E+05 | 32293.8  | 3           | 1.71E+06  | 1308016.3 | 5           | 7.85E+05  | 591121.0  | 5           | 8.68E+05  | 620971.4  | 5           | 9.07E+05   | 429841.0  | 5       |   |
| $\mu$ DYS |          | 1.86E+05       | 37133.8  | 4        | 1.60E+06 | 1526662.3   | 6         | 1.03E+06  | 874334.5    | 6         | 6.53E+05  | 845407.0    | 6         | 8.67E+06  | 18768056.8  | 6          |           |         |   |
| Combined  |          | 2.65E+05       | 210207.9 | 12       | 1.99E+06 | 1597467.7   | 17        | 8.58E+05  | 801882.4    | 17        | 1.25E+06  | 1496317.2   | 17        | 3.60E+06  | 11185583.5  | 17         |           |         |   |
| Cas9-FS   |          | Cas9           | IgG      | 3.49E+04 | 15326.9  | 5           | 3.63E+04  | 13803.9   | 6           | 3.95E+04  | 15384.2   | 6           | 3.77E+04  | 13651.1   | 6           | 3.93E+04   | 17438.7   | 6       |   |
| Cas9      |          |                |          | 3.17E+04 | 5719.7   | 3           | 2.73E+04  | 9139.8    | 5           | 3.09E+04  | 9324.3    | 5           | 2.44E+04  | 15646.1   | 5           | 2.95E+04   | 10184.3   | 5       |   |
| $\mu$ DYS | 2.37E+04 |                |          | 16457.2  | 4        | 2.75E+04    | 5337.6    | 6         | 3.08E+04    | 10357.6   | 6         | 2.92E+04    | 5128.1    | 6         | 2.76E+04    | 11223.5    | 6         |         |   |
| Combined  | 3.03E+04 |                |          | 13822.1  | 12       | 3.05E+04    | 10423.7   | 17        | 3.39E+04    | 12144.6   | 17        | 3.08E+04    | 12618.2   | 17        | 3.23E+04    | 13766.3    | 17        |         |   |
| Cas9-FS   | IgM      |                |          | 4.27E+04 | 24078.8  | 5           | 1.46E+05  | 114064.2  | 6           | 1.18E+05  | 59499.9   | 6           | 9.40E+04  | 55873.0   | 6           | 9.77E+04   | 62313.9   | 6       |   |
| Cas9      |          |                |          | 9.56E+04 | 81337.3  | 3           | 7.33E+04  | 66150.9   | 5           | 9.89E+04  | 81978.1   | 5           | 1.34E+05  | 220285.6  | 5           | 6.36E+04   | 43320.0   | 5       |   |
| $\mu$ DYS |          | 1.80E+05       | 85147.8  | 4        | 1.80E+06 | 4198394.4   | 6         | 8.79E+04  | 48783.1     | 6         | 1.19E+05  | 86754.5     | 6         | 7.13E+04  | 92261.8     | 6          |           |         |   |
| Combined  |          | 1.02E+05       | 84877.4  | 12       | 7.07E+05 | 2490410.6   | 17        | 1.02E+05  | 60847.1     | 17        | 1.15E+05  | 125486      | 17        | 7.84E+04  | 67598.1     | 17         |           |         |   |
| Cas9-FS   |          | $\mu$ DYS      | IgG      | 3.52E+04 | 15244.7  | 5           | 3.76E+04  | 13283.5   | 6           | 4.02E+04  | 15233.8   | 6           | 3.87E+04  | 12504.6   | 6           | 3.59E+04   | 10146.3   | 6       |   |
| Cas9      |          |                |          | 3.20E+04 | 5380.8   | 3           | 2.78E+04  | 9717.0    | 5           | 3.07E+04  | 8817.2    | 5           | 2.43E+04  | 15441.3   | 5           | 2.96E+04   | 9172.0    | 5       |   |
| $\mu$ DYS | 2.34E+04 |                |          | 17421.8  | 4        | 2.82E+04    | 4715.5    | 6         | 3.15E+04    | 7554.5    | 6         | 2.92E+04    | 5956.6    | 6         | 2.95E+04    | 9990.6     | 6         |         |   |
| Combined  | 3.04E+04 |                |          | 14196.7  | 12       | 3.14E+04    | 10384.5   | 17        | 3.43E+04    | 11398.7   | 17        | 3.11E+04    | 12527.9   | 17        | 3.18E+04    | 9709.4     | 17        |         |   |
| Cas9-FS   | IgM      |                |          | 2.25E+05 | 242845.3 | 5           | 1.58E+05  | 78693.3   | 6           | 1.22E+05  | 51700.4   | 6           | 4.14E+05  | 507931.3  | 6           | 1.66E+05   | 86891.6   | 6       |   |
| Cas9      |          |                |          | 1.39E+05 | 33281.7  | 3           | 1.06E+05  | 91715.7   | 5           | 1.00E+05  | 80598.0   | 5           | 1.48E+05  | 82102.2   | 5           | 9.28E+04   | 57229.9   | 5       |   |
| $\mu$ DYS |          | 1.73E+05       | 63036.1  | 4        | 1.85E+05 | 253983.5    | 6         | 1.62E+05  | 86055.9     | 6         | 1.36E+05  | 79596.8     | 6         | 1.44E+05  | 118387.6    | 6          |           |         |   |
| Combined  |          | 1.86E+05       | 155141.6 | 12       | 1.52E+05 | 158995.3    | 17        | 1.30E+05  | 73932.2     | 17        | 2.38E+05  | 319951.9    | 17        | 1.37E+05  | 92260.8     | 17         |           |         |   |

**Table S2. HCPM IgM and IgG multiple comparison statistics performed on the combined vector data.**

| Time point  | Antigen | Immunobulin | Average (ng/mL) | SD        | N  | Tukey's multiple comparison test                                                                                                                                                                                                                                                     | Key: levels of statistical significance                                                                                                                                                                                                                                                                                                                                     |
|-------------|---------|-------------|-----------------|-----------|----|--------------------------------------------------------------------------------------------------------------------------------------------------------------------------------------------------------------------------------------------------------------------------------------|-----------------------------------------------------------------------------------------------------------------------------------------------------------------------------------------------------------------------------------------------------------------------------------------------------------------------------------------------------------------------------|
| Pre         | AAV9    | IgG         | 3.05E+04        | 14334.69  | 12 | Pre vs Post-1 2wks (****), Pre vs Post-1 4wks (****), Pre vs Post-2 2wks (****), Pre vs Post-2 6wks (****), Post-1 2wks vs Post-1 4wks (****), Post-1 2wks vs Post-2 2wks (****), Post-1 2wks vs Post-2 6wks (****), Post-1 4wks vs Post-2 2wks (**), Post-1 4wks vs Post-2 6wks (*) | p < 0.05 (*)<br>p < 0.01 (**)<br>p < 0.001 (****)<br>p < 0.0001 (****)                                                                                                                                                                                                                                                                                                      |
| Post-1 2wks |         |             | 1.20E+05        | 21743.74  | 17 |                                                                                                                                                                                                                                                                                      |                                                                                                                                                                                                                                                                                                                                                                             |
| Post-1 4wks |         |             | 1.57E+05        | 28828.11  | 17 |                                                                                                                                                                                                                                                                                      |                                                                                                                                                                                                                                                                                                                                                                             |
| Post-2 2wks |         |             | 1.94E+05        | 34125.03  | 17 |                                                                                                                                                                                                                                                                                      |                                                                                                                                                                                                                                                                                                                                                                             |
| Post-2 6wks |         |             | 1.84E+05        | 24265.1   | 17 |                                                                                                                                                                                                                                                                                      |                                                                                                                                                                                                                                                                                                                                                                             |
| Pre         | AAV9    | IgM         | 1.27E+05        | 79770.6   | 12 | Pre vs Post-1 2wks (**)                                                                                                                                                                                                                                                              | Key: symbols in Figures 1 and S2 represent significance between comparisons<br>#: time points are significantly different compared to Pre<br>&: time points are significantly different compared to Post-1 (2 weeks)<br>\$: time points are significantly different compared to Post-1 (4 weeks)<br>♣: time points are significantly different compared to Post-2 (2 weeks) |
| Post-1 2wks |         |             | 1.13E+06        | 1017145.6 | 17 |                                                                                                                                                                                                                                                                                      |                                                                                                                                                                                                                                                                                                                                                                             |
| Post-1 4wks |         |             | 4.53E+05        | 420357.8  | 17 |                                                                                                                                                                                                                                                                                      |                                                                                                                                                                                                                                                                                                                                                                             |
| Post-2 2wks |         |             | 8.07E+05        | 923925.9  | 17 |                                                                                                                                                                                                                                                                                      |                                                                                                                                                                                                                                                                                                                                                                             |
| Post-2 6wks |         |             | 1.46E+06        | 3677581.6 | 17 |                                                                                                                                                                                                                                                                                      |                                                                                                                                                                                                                                                                                                                                                                             |
| Pre         | AAV2    | IgG         | 3.21E+04        | 11176     | 12 | Pre vs Post-1 2wks (***), Pre vs Post-1 4wks (****), Pre vs Post-2 2wks (****), Pre vs Post-2 6wks (****), Post-1 2wks vs Post-1 4wks (**), Post-1 2wks vs Post-2 2wks (****), Post-1 2wks vs Post-2 6wks (****), Post-1 4wks vs Post-2 2wks (**), Post-1 4wks vs Post-2 6wks (*)    |                                                                                                                                                                                                                                                                                                                                                                             |
| Post-1 2wks |         |             | 1.36E+05        | 64068.6   | 17 |                                                                                                                                                                                                                                                                                      |                                                                                                                                                                                                                                                                                                                                                                             |
| Post-1 4wks |         |             | 1.76E+05        | 62247.9   | 17 |                                                                                                                                                                                                                                                                                      |                                                                                                                                                                                                                                                                                                                                                                             |
| Post-2 2wks |         |             | 2.68E+05        | 66023.8   | 17 |                                                                                                                                                                                                                                                                                      |                                                                                                                                                                                                                                                                                                                                                                             |
| Post-2 6wks |         |             | 2.27E+05        | 49477.6   | 17 |                                                                                                                                                                                                                                                                                      |                                                                                                                                                                                                                                                                                                                                                                             |
| Pre         | AAV2    | IgM         | 4.80E+05        | 545092.5  | 12 | NS                                                                                                                                                                                                                                                                                   |                                                                                                                                                                                                                                                                                                                                                                             |
| Post-1 2wks |         |             | 8.53E+05        | 861203.3  | 17 |                                                                                                                                                                                                                                                                                      |                                                                                                                                                                                                                                                                                                                                                                             |
| Post-1 4wks |         |             | 6.89E+05        | 1000190.8 | 17 |                                                                                                                                                                                                                                                                                      |                                                                                                                                                                                                                                                                                                                                                                             |
| Post-2 2wks |         |             | 9.99E+05        | 1138073.3 | 17 |                                                                                                                                                                                                                                                                                      |                                                                                                                                                                                                                                                                                                                                                                             |
| Post-2 6wks |         |             | 4.87E+06        | 16963076  | 17 |                                                                                                                                                                                                                                                                                      |                                                                                                                                                                                                                                                                                                                                                                             |
| Pre         | AAV8    | IgG         | 3.15E+04        | 14651.4   | 12 | Pre vs Post-1 2wks (*), Pre vs Post-1 4wks (****), Pre vs Post-2 2wks (****), Pre vs Post-2 6wks (****), Post-1 2wks vs Post-1 4wks (****), Post-1 2wks vs Post-2 2wks (****), Post-1 2wks vs Post-2 6wks (****), Post-1 4wks vs Post-2 2wks (**), Post-1 4wks vs Post-2 6wks (*)    |                                                                                                                                                                                                                                                                                                                                                                             |
| Post-1 2wks |         |             | 1.51E+05        | 99136.2   | 17 |                                                                                                                                                                                                                                                                                      |                                                                                                                                                                                                                                                                                                                                                                             |
| Post-1 4wks |         |             | 2.28E+05        | 86540.9   | 17 |                                                                                                                                                                                                                                                                                      |                                                                                                                                                                                                                                                                                                                                                                             |
| Post-2 2wks |         |             | 3.13E+05        | 64135.4   | 17 |                                                                                                                                                                                                                                                                                      |                                                                                                                                                                                                                                                                                                                                                                             |
| Post-2 6wks |         |             | 2.91E+05        | 62423     | 17 |                                                                                                                                                                                                                                                                                      |                                                                                                                                                                                                                                                                                                                                                                             |
| Pre         | AAV8    | IgM         | 2.89E+05        | 163266.9  | 12 | Pre vs Post-1 2wks (*)                                                                                                                                                                                                                                                               |                                                                                                                                                                                                                                                                                                                                                                             |
| Post-1 2wks |         |             | 1.36E+06        | 1078257.4 | 17 |                                                                                                                                                                                                                                                                                      |                                                                                                                                                                                                                                                                                                                                                                             |
| Post-1 4wks |         |             | 7.35E+05        | 801383.8  | 17 |                                                                                                                                                                                                                                                                                      |                                                                                                                                                                                                                                                                                                                                                                             |
| Post-2 2wks |         |             | 1.71E+06        | 1875019.9 | 17 |                                                                                                                                                                                                                                                                                      |                                                                                                                                                                                                                                                                                                                                                                             |
| Post-2 6wks |         |             | 2.75E+06        | 6306277.9 | 17 |                                                                                                                                                                                                                                                                                      |                                                                                                                                                                                                                                                                                                                                                                             |
| Pre         | AAVMYO  | IgG         | 3.08E+04        | 14318     | 12 | Pre vs Post-1 2wks (****), Pre vs Post-1 4wks (****), Pre vs Post-2 2wks (****), Pre vs Post-2 6wks (****), Post-1 2wks vs Post-1 4wks (*), Post-1 2wks vs Post-2 2wks (****), Post-1 2wks vs Post-2 6wks (****)                                                                     |                                                                                                                                                                                                                                                                                                                                                                             |
| Post-1 2wks |         |             | 1.76E+05        | 31325.4   | 17 |                                                                                                                                                                                                                                                                                      |                                                                                                                                                                                                                                                                                                                                                                             |
| Post-1 4wks |         |             | 2.09E+05        | 43909.8   | 17 |                                                                                                                                                                                                                                                                                      |                                                                                                                                                                                                                                                                                                                                                                             |
| Post-2 2wks |         |             | 2.40E+05        | 37701.1   | 17 |                                                                                                                                                                                                                                                                                      |                                                                                                                                                                                                                                                                                                                                                                             |
| Post-2 6wks |         |             | 2.36E+05        | 32700.8   | 17 |                                                                                                                                                                                                                                                                                      |                                                                                                                                                                                                                                                                                                                                                                             |
| Pre         | AAVMYO  | IgM         | 2.65E+05        | 210207.9  | 12 | Pre vs Post-1 2wks (**)                                                                                                                                                                                                                                                              |                                                                                                                                                                                                                                                                                                                                                                             |
| Post-1 2wks |         |             | 1.99E+06        | 1597467.7 | 17 |                                                                                                                                                                                                                                                                                      |                                                                                                                                                                                                                                                                                                                                                                             |
| Post-1 4wks |         |             | 8.58E+05        | 801882.4  | 17 |                                                                                                                                                                                                                                                                                      |                                                                                                                                                                                                                                                                                                                                                                             |
| Post-2 2wks |         |             | 1.25E+06        | 1496317.2 | 17 |                                                                                                                                                                                                                                                                                      |                                                                                                                                                                                                                                                                                                                                                                             |
| Post-2 6wks |         |             | 3.60E+06        | 11185584  | 17 |                                                                                                                                                                                                                                                                                      |                                                                                                                                                                                                                                                                                                                                                                             |
| Pre         | Cas9    | IgG         | 3.03E+04        | 13822.1   | 12 | NS                                                                                                                                                                                                                                                                                   |                                                                                                                                                                                                                                                                                                                                                                             |
| Post-1 2wks |         |             | 3.05E+04        | 10423.7   | 17 |                                                                                                                                                                                                                                                                                      |                                                                                                                                                                                                                                                                                                                                                                             |
| Post-1 4wks |         |             | 3.39E+04        | 12144.6   | 17 |                                                                                                                                                                                                                                                                                      |                                                                                                                                                                                                                                                                                                                                                                             |
| Post-2 2wks |         |             | 3.08E+04        | 12618.2   | 17 |                                                                                                                                                                                                                                                                                      |                                                                                                                                                                                                                                                                                                                                                                             |
| Post-2 6wks |         |             | 3.23E+04        | 13766.3   | 17 |                                                                                                                                                                                                                                                                                      |                                                                                                                                                                                                                                                                                                                                                                             |
| Pre         | Cas9    | IgM         | 1.02E+05        | 84877.4   | 12 | NS                                                                                                                                                                                                                                                                                   |                                                                                                                                                                                                                                                                                                                                                                             |
| Post-1 2wks |         |             | 7.07E+05        | 2490410.6 | 17 |                                                                                                                                                                                                                                                                                      |                                                                                                                                                                                                                                                                                                                                                                             |
| Post-1 4wks |         |             | 1.02E+05        | 60847.1   | 17 |                                                                                                                                                                                                                                                                                      |                                                                                                                                                                                                                                                                                                                                                                             |
| Post-2 2wks |         |             | 1.15E+05        | 125486    | 17 |                                                                                                                                                                                                                                                                                      |                                                                                                                                                                                                                                                                                                                                                                             |
| Post-2 6wks |         |             | 7.84E+04        | 67598.1   | 17 |                                                                                                                                                                                                                                                                                      |                                                                                                                                                                                                                                                                                                                                                                             |
| Pre         | μDYS    | IgG         | 3.04E+04        | 14196.7   | 12 | NS                                                                                                                                                                                                                                                                                   |                                                                                                                                                                                                                                                                                                                                                                             |
| Post-1 2wks |         |             | 3.14E+04        | 10384.5   | 17 |                                                                                                                                                                                                                                                                                      |                                                                                                                                                                                                                                                                                                                                                                             |
| Post-1 4wks |         |             | 3.43E+04        | 11398.7   | 17 |                                                                                                                                                                                                                                                                                      |                                                                                                                                                                                                                                                                                                                                                                             |
| Post-2 2wks |         |             | 3.11E+04        | 12527.9   | 17 |                                                                                                                                                                                                                                                                                      |                                                                                                                                                                                                                                                                                                                                                                             |
| Post-2 6wks |         |             | 3.18E+04        | 9709.4    | 17 |                                                                                                                                                                                                                                                                                      |                                                                                                                                                                                                                                                                                                                                                                             |
| Pre         | μDYS    | IgM         | 1.86E+05        | 155141.6  | 12 | NS                                                                                                                                                                                                                                                                                   |                                                                                                                                                                                                                                                                                                                                                                             |
| Post-1 2wks |         |             | 1.52E+05        | 158995.3  | 17 |                                                                                                                                                                                                                                                                                      |                                                                                                                                                                                                                                                                                                                                                                             |
| Post-1 4wks |         |             | 1.30E+05        | 73932.2   | 17 |                                                                                                                                                                                                                                                                                      |                                                                                                                                                                                                                                                                                                                                                                             |
| Post-2 2wks |         |             | 2.38E+05        | 319951.9  | 17 |                                                                                                                                                                                                                                                                                      |                                                                                                                                                                                                                                                                                                                                                                             |
| Post-2 6wks |         |             | 1.37E+05        | 92260.8   | 17 |                                                                                                                                                                                                                                                                                      |                                                                                                                                                                                                                                                                                                                                                                             |

**Table S3. Mean concentration of complement components in AAV9-Cas9, AAV9-Cas9-FS and AAV9- $\mu$ DYS dosed *mdx* mice.**

| Vector    | Complement   | Pre    | SD   | N  | Post-1 5hrs | SD    | N  | Post-1 2wks | SD    | N  | Post-2 5hrs | SD    | N  | Post-2 2wks | SD    | N  |
|-----------|--------------|--------|------|----|-------------|-------|----|-------------|-------|----|-------------|-------|----|-------------|-------|----|
| Cas9-FS   | C3 (mg/mL)   | 1.30   | 0.5  | 6  | 1.69        | 0.4   | 6  | 1.89        | 0.5   | 6  | 1.08        | 0.3   | 6  | 1.67        | 0.3   | 6  |
| Cas9      |              | 1.29   | 0.4  | 6  | 2.02        | 1.0   | 6  | 1.77        | 0.5   | 6  | 1.27        | 0.7   | 6  | 1.70        | 0.6   | 6  |
| $\mu$ DYS |              | 1.79   | 0.4  | 6  | 2.28        | 1.4   | 6  | 1.83        | 0.5   | 6  | 1.14        | 0.4   | 6  | 1.41        | 0.5   | 6  |
| Combined  |              | 1.74   | 0.4  | 18 | 2.00        | 1.0   | 18 | 1.83        | 0.5   | 18 | 1.16        | 0.5   | 18 | 1.59        | 0.5   | 18 |
| Cas9-FS   | C4 (ng/mL)   | 146.03 | 33.1 | 3  | 95.70       | 7.3   | 3  | 94.25       | 13.0  | 3  | 54.85       | 14.6  | 3  | 68.48       | 21.3  | 3  |
| Cas9      |              | 152.81 | 98.8 | 3  | 85.11       | 46.1  | 3  | 166.32      | 88.2  | 3  | 91.97       | 3.2   | 3  | 120.51      | 113.1 | 3  |
| $\mu$ DYS |              | 140.06 | 11.7 | 3  | 126.88      | 38.3  | 3  | 37.10       | 22.0  | 3  | 72.27       | 7.5   | 3  | 42.85       | 26.2  | 3  |
| Combined  |              | 146.30 | 52.7 | 9  | 102.57      | 35.6  | 9  | 99.22       | 72.5  | 9  | 73.03       | 18.1  | 9  | 77.28       | 68.3  | 9  |
| Cas9-FS   | C5b9 (ng/mL) | 563.74 | 84.1 | 3  | 668.02      | 106.4 | 3  | 713.74      | 111.0 | 3  | 594.83      | 102.8 | 3  | 530.21      | 177.8 | 3  |
| Cas9      |              | 484.20 | 68.3 | 3  | 552.42      | 162.5 | 3  | 542.70      | 77.3  | 3  | 358.20      | 27.5  | 3  | 559.47      | 63.4  | 3  |
| $\mu$ DYS |              | 606.91 | 82.1 | 3  | 464.41      | 293.2 | 3  | 497.54      | 24.0  | 3  | 539.20      | 32.2  | 3  | 491.70      | 157.3 | 3  |
| Combined  |              | 551.62 | 86.7 | 9  | 561.62      | 196.8 | 9  | 584.66      | 120.3 | 9  | 497.41      | 120.7 | 9  | 527.13      | 126.3 | 9  |

**Table S4. Complement C3, C4 and C5b9 multiple comparison statistics performed on the combined vector data.**

| Time point  | Complement   | Average    | SD     | N    | Tukey's multiple comparison test                                                                                                   | Key: levels of statistical significance |
|-------------|--------------|------------|--------|------|------------------------------------------------------------------------------------------------------------------------------------|-----------------------------------------|
| Pre         | C3 (mg/mL)   | 1.74       | 0.4    | 18   | Pre vs Post-2 5hrs (****), Post-1 5hrs vs Post-2 5hrs (****), Post-1 2wks vs Post-2 5hrs (****), Post-2 5hrs vs Post-2 2wks (****) | $p < 0.05$ (*)                          |
| Post-1 5hrs |              | 2.00       | 1.0    | 18   |                                                                                                                                    | $p < 0.01$ (**)                         |
| Post-1 2wks |              | 1.83       | 0.5    | 18   |                                                                                                                                    | $p < 0.001$ (***)                       |
| Post-2 5hrs |              | 1.16       | 0.5    | 18   |                                                                                                                                    | $p < 0.0001$ (****)                     |
| Post-2 2wks |              | 1.59       | 0.5    | 18   |                                                                                                                                    |                                         |
| Pre         |              | C4 (ng/mL) | 146.30 | 52.7 |                                                                                                                                    | 9                                       |
| Post-1 5hrs | 102.57       |            | 35.6   | 9    | †: time points are significantly different compared to Post-2 (5 hours)                                                            |                                         |
| Post-1 2wks | 99.22        |            | 72.5   | 9    |                                                                                                                                    |                                         |
| Post-2 5hrs | 73.03        |            | 18.1   | 9    |                                                                                                                                    |                                         |
| Post-2 2wks | 77.28        |            | 68.3   | 9    |                                                                                                                                    |                                         |
| Pre         | C5b9 (ng/mL) | 551.62     | 86.7   | 9    | NS                                                                                                                                 |                                         |
| Post-1 5hrs |              | 561.62     | 196.8  | 9    |                                                                                                                                    |                                         |
| Post-1 2wks |              | 584.66     | 120.3  | 9    |                                                                                                                                    |                                         |
| Post-2 5hrs |              | 497.41     | 120.7  | 9    |                                                                                                                                    |                                         |
| Post-2 2wks | 527.13       | 126.3      | 9      |      |                                                                                                                                    |                                         |

**Table S5. Mean concentration (pg/mL) of analytes in plasma from AAV9-Cas9, AAV9-Cas9-FS and AAV9- $\mu$ DYS dosed *mdx* mice.**

| Vector    | Analyte        | Pre     | SD     | N  | Post-1 5hrs | SD     | N  | Post-1 2wks | SD    | N  | Post-2 5hrs | SD     | N  | Post-2 2wks | SD    | N  |
|-----------|----------------|---------|--------|----|-------------|--------|----|-------------|-------|----|-------------|--------|----|-------------|-------|----|
| Cas9-FS   | IP-10          | 776.53  | 300.0  | 6  | 1151.27     | 660.3  | 6  | 484.70      | 170.5 | 6  | 3156.87     | 1382.4 | 6  | 544.69      | 187.7 | 6  |
| Cas9      |                | 710.99  | 368.3  | 6  | 568.40      | 336.4  | 6  | 200.56      | 201.2 | 6  | 6055.32     | 4834.8 | 6  | 320.28      | 173.7 | 6  |
| $\mu$ DYS |                | 594.33  | 247.1  | 6  | 954.98      | 1015.4 | 6  | 383.75      | 211.0 | 6  | 2654.30     | 1840.6 | 6  | 514.14      | 155.7 | 6  |
| Combined  |                | 693.95  | 300.6  | 18 | 891.55      | 725.8  | 18 | 356.34      | 219.5 | 18 | 3955.49     | 3288.2 | 18 | 459.70      | 191.9 | 18 |
| Cas9-FS   | MIP-1 $\beta$  | 0.76    | 0.3    | 6  | 2.14        | 2.6    | 6  | 0.76        | 0.3   | 6  | 3.73        | 5.0    | 6  | 1.16        | 0.6   | 6  |
| Cas9      |                | 0.67    | 0.2    | 6  | 1.10        | 0.4    | 6  | 0.85        | 0.4   | 6  | 4.08        | 2.4    | 6  | 1.10        | 0.5   | 6  |
| $\mu$ DYS |                | 0.26    | 0.2    | 6  | 1.19        | 1.8    | 6  | 0.50        | 0.6   | 6  | 3.18        | 4.7    | 6  | 1.15        | 1.4   | 6  |
| Combined  |                | 0.56    | 0.3    | 18 | 1.48        | 1.8    | 18 | 0.70        | 0.4   | 18 | 3.66        | 4.0    | 18 | 1.14        | 0.9   | 18 |
| Cas9-FS   | MCP-1          | 89.73   | 42.0   | 6  | 260.12      | 269.2  | 6  | 111.06      | 53.1  | 6  | 244.08      | 45.6   | 6  | 89.87       | 35.1  | 6  |
| Cas9      |                | 102.95  | 26.8   | 6  | 118.98      | 24.4   | 6  | 151.80      | 108.2 | 6  | 611.33      | 402.6  | 6  | 55.90       | 44.3  | 6  |
| $\mu$ DYS |                | 92.83   | 55.5   | 6  | 161.89      | 145.7  | 6  | 66.96       | 56.9  | 6  | 175.73      | 109.7  | 6  | 48.99       | 41.4  | 6  |
| Combined  |                | 95.17   | 40.9   | 18 | 180.33      | 177.3  | 18 | 109.94      | 80.6  | 18 | 343.72      | 300.9  | 18 | 64.92       | 42.2  | 18 |
| Cas9-FS   | TNF- $\alpha$  | 3.14    | 1.9    | 6  | 7.21        | 4.2    | 6  | 5.42        | 1.1   | 6  | 7.13        | 3.4    | 6  | 5.27        | 2.6   | 6  |
| Cas9      |                | 2.99    | 0.7    | 6  | 3.84        | 1.8    | 6  | 3.63        | 1.6   | 6  | 6.23        | 2.2    | 6  | 2.30        | 1.0   | 6  |
| $\mu$ DYS |                | 2.48    | 1.9    | 6  | 3.74        | 3.0    | 6  | 3.34        | 2.0   | 6  | 5.83        | 3.3    | 6  | 4.61        | 3.5   | 6  |
| Combined  |                | 2.87    | 1.5    | 18 | 4.93        | 3.4    | 18 | 4.13        | 1.8   | 18 | 6.40        | 2.9    | 18 | 4.06        | 2.7   | 18 |
| Cas9-FS   | IL-6           | 19.39   | 15.3   | 6  | 70.32       | 59.9   | 6  | 24.96       | 22.3  | 6  | 32.32       | 47.4   | 6  | 6.21        | 3.3   | 6  |
| Cas9      |                | 11.29   | 7.8    | 6  | 48.94       | 35.2   | 6  | 5.99        | 3.9   | 6  | 120.07      | 249.6  | 6  | 2.95        | 0.7   | 6  |
| $\mu$ DYS |                | 9.09    | 8.1    | 6  | 40.50       | 27.4   | 6  | 13.25       | 22.2  | 6  | 68.54       | 55.1   | 6  | 5.75        | 3.8   | 6  |
| Combined  |                | 13.26   | 11.3   | 18 | 53.25       | 42.5   | 18 | 14.73       | 19.0  | 18 | 73.64       | 145.8  | 18 | 4.97        | 3.2   | 18 |
| Cas9-FS   | IL-15          | 3.07    | 0.4    | 6  | 4.71        | 2.0    | 6  | 3.18        | 0.6   | 6  | 3.05        | 0.7    | 6  | 2.36        | 1.0   | 6  |
| Cas9      |                | 3.39    | 0.9    | 6  | 4.81        | 1.6    | 6  | 3.21        | 0.8   | 6  | 2.64        | 1.5    | 6  | 2.68        | 1.2   | 6  |
| $\mu$ DYS |                | 3.36    | 1.1    | 6  | 3.52        | 1.2    | 6  | 2.43        | 1.3   | 6  | 2.34        | 1.4    | 6  | 2.29        | 0.8   | 6  |
| Combined  |                | 3.27    | 0.8    | 18 | 4.35        | 1.6    | 18 | 2.94        | 1.0   | 18 | 2.67        | 1.2    | 18 | 2.44        | 1.0   | 18 |
| Cas9-FS   | MIP-2 $\alpha$ | 6.54    | 4.5    | 6  | 14.53       | 9.4    | 6  | 12.44       | 4.1   | 6  | 13.51       | 9.6    | 6  | 12.34       | 7.7   | 6  |
| Cas9      |                | 7.88    | 3.5    | 6  | 11.53       | 4.0    | 6  | 9.88        | 2.9   | 6  | 11.52       | 2.8    | 6  | 12.05       | 8.1   | 6  |
| $\mu$ DYS |                | 7.44    | 3.7    | 6  | 9.63        | 5.5    | 6  | 9.22        | 7.8   | 6  | 9.30        | 2.9    | 6  | 12.83       | 10.5  | 6  |
| Combined  |                | 7.29    | 3.7    | 18 | 11.90       | 6.6    | 18 | 10.51       | 5.2   | 18 | 11.44       | 5.9    | 18 | 12.41       | 8.3   | 18 |
| Cas9-FS   | IL-18          | 1421.36 | 1497.9 | 6  | 990.88      | 777.9  | 6  | 308.98      | 224.3 | 6  | 372.14      | 212.1  | 6  | 179.18      | 42.6  | 6  |
| Cas9      |                | 372.02  | 174.6  | 6  | 530.80      | 400.2  | 6  | 267.97      | 112.0 | 6  | 393.12      | 457.4  | 6  | 145.83      | 79.3  | 6  |
| $\mu$ DYS |                | 282.34  | 112.7  | 6  | 325.73      | 130.2  | 6  | 210.87      | 154.6 | 6  | 269.82      | 93.7   | 6  | 293.83      | 62.6  | 6  |
| Combined  |                | 691.91  | 977.6  | 18 | 615.81      | 558.5  | 18 | 262.60      | 165.0 | 18 | 345.02      | 283.6  | 18 | 206.28      | 88.3  | 18 |
| Cas9-FS   | IL-1 $\alpha$  | 12.10   | 6.7    | 6  | 19.76       | 10.4   | 6  | 10.70       | 6.2   | 6  | 24.00       | 25.3   | 6  | 23.62       | 16.9  | 6  |
| Cas9      |                | 7.71    | 5.4    | 6  | 12.15       | 4.9    | 6  | 10.02       | 4.4   | 6  | 11.90       | 7.2    | 6  | 11.14       | 6.1   | 6  |
| $\mu$ DYS |                | 12.39   | 4.3    | 6  | 15.77       | 6.0    | 6  | 14.39       | 13.0  | 6  | 12.12       | 5.9    | 6  | 13.33       | 7.0   | 6  |
| Combined  |                | 10.73   | 5.7    | 18 | 15.89       | 7.8    | 18 | 11.71       | 8.4   | 18 | 16.01       | 15.7   | 18 | 16.03       | 11.9  | 18 |
| Cas9-FS   | IL-5           | 9.14    | 6.2    | 6  | 8.25        | 1.5    | 6  | 7.46        | 4.9   | 6  | 12.00       | 11.3   | 6  | 6.94        | 2.6   | 6  |
| Cas9      |                | 5.53    | 3.2    | 6  | 6.50        | 2.5    | 6  | 8.86        | 3.4   | 6  | 10.24       | 7.9    | 6  | 6.54        | 5.0   | 6  |
| $\mu$ DYS |                | 4.23    | 2.0    | 6  | 4.01        | 1.6    | 6  | 3.65        | 2.7   | 6  | 10.29       | 10.8   | 6  | 3.37        | 1.7   | 6  |
| Combined  |                | 6.30    | 4.5    | 18 | 6.25        | 2.5    | 18 | 6.66        | 4.2   | 18 | 10.85       | 9.5    | 18 | 5.62        | 3.6   | 18 |
| Cas9-FS   | IL-7           | 17.80   | 10.6   | 6  | 18.05       | 14.2   | 6  | 14.08       | 10.8  | 6  | 12.50       | 6.1    | 6  | 21.38       | 17.7  | 6  |
| Cas9      |                | 10.77   | 4.5    | 6  | 20.22       | 12.8   | 6  | 9.96        | 4.9   | 6  | 6.57        | 2.5    | 6  | 17.74       | 19.1  | 6  |
| $\mu$ DYS |                | 9.88    | 5.4    | 6  | 8.62        | 4.0    | 6  | 17.28       | 12.4  | 6  | 5.00        | 1.5    | 6  | 12.56       | 5.4   | 6  |
| Combined  |                | 12.81   | 7.8    | 18 | 15.63       | 11.8   | 18 | 13.77       | 9.8   | 18 | 8.02        | 4.9    | 18 | 17.22       | 14.9  | 18 |
| Cas9-FS   | IL-9           | 90.85   | 48.4   | 6  | 102.33      | 63.9   | 6  | 78.83       | 45.0  | 6  | 55.60       | 34.6   | 6  | 79.71       | 37.2  | 6  |
| Cas9      |                | 44.40   | 15.9   | 6  | 61.44       | 36.3   | 6  | 64.96       | 13.1  | 6  | 41.49       | 34.6   | 6  | 62.28       | 51.3  | 6  |
| $\mu$ DYS |                | 41.08   | 15.1   | 6  | 33.03       | 21.3   | 6  | 98.66       | 123.1 | 6  | 31.34       | 20.5   | 6  | 39.06       | 22.1  | 6  |
| Combined  |                | 58.78   | 37.1   | 18 | 65.60       | 50.8   | 18 | 80.81       | 72.9  | 18 | 42.81       | 30.5   | 18 | 60.35       | 40.2  | 18 |
| Cas9-FS   | IL-10          | 5.06    | 4.1    | 6  | 8.64        | 5.4    | 6  | 5.71        | 3.9   | 6  | 5.98        | 4.4    | 6  | 5.67        | 5.0   | 6  |
| Cas9      |                | 3.03    | 2.1    | 6  | 5.10        | 4.1    | 6  | 4.29        | 2.3   | 6  | 5.84        | 1.9    | 6  | 4.53        | 5.0   | 6  |
| $\mu$ DYS |                | 2.53    | 1.0    | 6  | 1.89        | 0.9    | 6  | 4.04        | 5.6   | 6  | 2.26        | 0.7    | 6  | 1.45        | 0.8   | 6  |
| Combined  |                | 3.54    | 2.8    | 18 | 5.21        | 4.7    | 18 | 4.68        | 4.0   | 18 | 4.69        | 3.2    | 18 | 3.88        | 4.3   | 18 |
| Cas9-FS   | IL-13          | 40.83   | 24.5   | 6  | 53.05       | 38.0   | 6  | 44.30       | 31.1  | 6  | 27.26       | 18.2   | 6  | 34.11       | 22.6  | 6  |
| Cas9      |                | 21.03   | 11.1   | 6  | 40.63       | 29.2   | 6  | 23.63       | 9.2   | 6  | 15.35       | 8.5    | 6  | 25.09       | 26.2  | 6  |
| $\mu$ DYS |                | 22.14   | 5.5    | 6  | 15.60       | 12.9   | 6  | 25.86       | 18.5  | 6  | 11.04       | 6.7    | 6  | 15.97       | 13.9  | 6  |
| Combined  |                | 28.00   | 17.6   | 18 | 36.43       | 31.3   | 18 | 31.26       | 22.4  | 18 | 17.89       | 13.5   | 18 | 25.05       | 21.6  | 18 |
| Cas9-FS   | MIG            | 191.39  | 150.5  | 6  | 305.89      | 169.5  | 6  | 146.10      | 145.9 | 6  | 224.58      | 100.7  | 6  | 100.81      | 86.5  | 6  |
| Cas9      |                | 126.81  | 102.0  | 6  | 145.83      | 80.1   | 6  | 160.31      | 150.4 | 6  | 167.04      | 128.9  | 6  | 151.85      | 190.8 | 6  |
| $\mu$ DYS |                | 172.32  | 141.8  | 6  | 185.95      | 218.1  | 6  | 94.67       | 88.9  | 6  | 140.63      | 110.8  | 6  | 103.40      | 62.9  | 6  |
| Combined  |                | 163.50  | 128.1  | 18 | 212.56      | 171.0  | 18 | 133.69      | 126.8 | 18 | 177.42      | 113.1  | 18 | 118.69      | 121.1 | 18 |
| Cas9-FS   | MIP-1 $\alpha$ | 2.73    | 1.9    | 6  | 5.91        | 6.6    | 6  | 2.34        | 1.9   | 6  | 4.01        | 3.3    | 6  | 2.65        | 2.2   | 6  |
| Cas9      |                | 0.93    | 0.6    | 6  | 2.95        | 1.7    | 6  | 1.25        | 0.6   | 6  | 1.79        | 0.8    | 6  | 1.61        | 1.4   | 6  |
| $\mu$ DYS |                | 0.97    | 0.5    | 6  | 8.14        | 17.0   | 6  | 1.70        | 1.8   | 6  | 2.25        | 1.7    | 6  | 2.74        | 4.4   | 6  |
| Combined  |                | 1.54    | 1.4    | 18 | 5.67        | 10.2   | 18 | 1.77        | 1.5   | 18 | 2.68        | 2.3    | 18 | 2.34        | 2.8   | 18 |
| Cas9-FS   | RANTES         | 65.72   | 14.7   | 6  | 108.61      | 43.9   | 6  | 62.40       | 14.7  | 6  | 95.93       | 50.9   | 6  | 75.67       | 36.2  | 6  |
| Cas9      |                | 58.27   | 13.1   | 6  | 69.58       | 27.7   | 6  | 45.51       | 20.5  | 6  | 74.34       | 13.1   | 6  | 45.68       | 25.6  | 6  |
| $\mu$ DYS |                | 52.39   | 22.1   | 6  | 59.05       | 22.9   | 6  | 56.60       | 35.0  | 6  | 52.40       | 15.9   | 6  | 60.03       | 14.8  | 6  |
| Combined  |                | 58.79   | 17.0   | 18 | 79.08       | 37.8   | 18 | 54.84       | 24.5  | 18 | 74.22       | 35.0   | 18 | 60.46       | 28.3  | 18 |

**Table S6. Multiple comparison statistics of analytes detected in plasma performed on the combined vector data.**

| Time point  | Analyte | Average (pg/mL) | SD     | N  | Tukey's multiple comparison test                                                                                                                                                                                       | Key: levels of statistical significance                                                                                                                                                                                                                                                           |
|-------------|---------|-----------------|--------|----|------------------------------------------------------------------------------------------------------------------------------------------------------------------------------------------------------------------------|---------------------------------------------------------------------------------------------------------------------------------------------------------------------------------------------------------------------------------------------------------------------------------------------------|
| Pre         | IP-10   | 693.95          | 300.6  | 18 | Pre vs Post-1 2wks (**), Pre vs Post-2 5hrs (**),<br>Pre vs Post-2 2wks (*), Post-1 5hrs vs Post-1<br>2wks (*), Post-1 5hrs vs Post-2 5hrs (*), Post-1<br>2wks vs Post-2 5hrs (**), Post-2 5hrs vs Post-2<br>2wks (**) | p < 0.05 (*)<br>p < 0.01 (**)<br>p < 0.001 (***)<br>p < 0.0001(****)                                                                                                                                                                                                                              |
| Post-1 5hrs |         | 891.55          | 725.8  | 18 |                                                                                                                                                                                                                        |                                                                                                                                                                                                                                                                                                   |
| Post-1 2wks |         | 356.34          | 219.5  | 18 |                                                                                                                                                                                                                        |                                                                                                                                                                                                                                                                                                   |
| Post-2 5hrs |         | 3955.49         | 3288.2 | 18 |                                                                                                                                                                                                                        |                                                                                                                                                                                                                                                                                                   |
| Post-2 2wks |         | 459.70          | 191.9  | 18 |                                                                                                                                                                                                                        |                                                                                                                                                                                                                                                                                                   |
| Pre         | MIP-1β  | 0.56            | 0.3    | 18 | Pre vs Post-2 5hrs (*), Post-1 2wks vs Post-2<br>5hrs (*)                                                                                                                                                              | Key: symbols in Figures 2D and S3B represent significance between comparisons<br>#: time points are significantly different compared to Pre<br>†: time points are significantly different compared to Post-1 (5 hours)<br>‡: time points are significantly different compared to Post-2 (5 hours) |
| Post-1 5hrs |         | 1.48            | 1.8    | 18 |                                                                                                                                                                                                                        |                                                                                                                                                                                                                                                                                                   |
| Post-1 2wks |         | 0.70            | 0.4    | 18 |                                                                                                                                                                                                                        |                                                                                                                                                                                                                                                                                                   |
| Post-2 5hrs |         | 3.66            | 4.0    | 18 |                                                                                                                                                                                                                        |                                                                                                                                                                                                                                                                                                   |
| Post-2 2wks |         | 1.14            | 0.9    | 18 |                                                                                                                                                                                                                        |                                                                                                                                                                                                                                                                                                   |
| Pre         | MCP-1   | 95.17           | 40.9   | 18 | Pre vs Post-2 5hrs (*), Post-1 2wks vs Post-2<br>5hrs (**), Post-2 5hrs vs Post-2 2wks (**)                                                                                                                            |                                                                                                                                                                                                                                                                                                   |
| Post-1 5hrs |         | 180.33          | 177.3  | 18 |                                                                                                                                                                                                                        |                                                                                                                                                                                                                                                                                                   |
| Post-1 2wks |         | 109.94          | 80.6   | 18 |                                                                                                                                                                                                                        |                                                                                                                                                                                                                                                                                                   |
| Post-2 5hrs |         | 343.72          | 300.9  | 18 |                                                                                                                                                                                                                        |                                                                                                                                                                                                                                                                                                   |
| Post-2 2wks |         | 64.92           | 42.2   | 18 |                                                                                                                                                                                                                        |                                                                                                                                                                                                                                                                                                   |
| Pre         | TNF-α   | 2.87            | 1.5    | 18 | Pre vs Post-2 5hrs (**), Post-1 2wks vs Post-2<br>5hrs (*)                                                                                                                                                             |                                                                                                                                                                                                                                                                                                   |
| Post-1 5hrs |         | 4.93            | 3.4    | 18 |                                                                                                                                                                                                                        |                                                                                                                                                                                                                                                                                                   |
| Post-1 2wks |         | 4.13            | 1.8    | 18 |                                                                                                                                                                                                                        |                                                                                                                                                                                                                                                                                                   |
| Post-2 5hrs |         | 6.40            | 2.9    | 18 |                                                                                                                                                                                                                        |                                                                                                                                                                                                                                                                                                   |
| Post-2 2wks |         | 4.06            | 2.7    | 18 |                                                                                                                                                                                                                        |                                                                                                                                                                                                                                                                                                   |
| Pre         | IL-6    | 13.26           | 11.3   | 18 | Pre vs Post-1 5hrs (**), Pre vs Post-1 2wks (*),<br>Post-1 5hrs vs Post-1 2wks (**), Post-1 5hrs vs<br>Post-2 2wks (**)                                                                                                |                                                                                                                                                                                                                                                                                                   |
| Post-1 5hrs |         | 53.25           | 42.5   | 18 |                                                                                                                                                                                                                        |                                                                                                                                                                                                                                                                                                   |
| Post-1 2wks |         | 14.73           | 19.0   | 18 |                                                                                                                                                                                                                        |                                                                                                                                                                                                                                                                                                   |
| Post-2 5hrs |         | 73.64           | 145.8  | 18 |                                                                                                                                                                                                                        |                                                                                                                                                                                                                                                                                                   |
| Post-2 2wks |         | 4.97            | 3.2    | 18 |                                                                                                                                                                                                                        |                                                                                                                                                                                                                                                                                                   |
| Pre         | IL-15   | 3.27            | 0.8    | 18 | Pre vs Post-1 5hrs (*), Pre vs Post-1 2wks (**),<br>Post-1 5hrs vs Post-1 2wks (*), Post-1 5hrs vs<br>Post-2 5hrs (*), Post-1 5hrs vs Post-2 2wks<br>(***)                                                             |                                                                                                                                                                                                                                                                                                   |
| Post-1 5hrs |         | 4.35            | 1.6    | 18 |                                                                                                                                                                                                                        |                                                                                                                                                                                                                                                                                                   |
| Post-1 2wks |         | 2.94            | 1.0    | 18 |                                                                                                                                                                                                                        |                                                                                                                                                                                                                                                                                                   |
| Post-2 5hrs |         | 2.67            | 1.2    | 18 |                                                                                                                                                                                                                        |                                                                                                                                                                                                                                                                                                   |
| Post-2 2wks |         | 2.44            | 1.0    | 18 |                                                                                                                                                                                                                        |                                                                                                                                                                                                                                                                                                   |
| Pre         | MIP-2α  | 7.29            | 3.7    | 18 | Pre vs Post-1 5hrs (*)                                                                                                                                                                                                 |                                                                                                                                                                                                                                                                                                   |
| Post-1 5hrs |         | 11.90           | 6.6    | 18 |                                                                                                                                                                                                                        |                                                                                                                                                                                                                                                                                                   |
| Post-1 2wks |         | 10.51           | 5.2    | 18 |                                                                                                                                                                                                                        |                                                                                                                                                                                                                                                                                                   |
| Post-2 5hrs |         | 11.44           | 5.9    | 18 |                                                                                                                                                                                                                        |                                                                                                                                                                                                                                                                                                   |
| Post-2 2wks |         | 12.41           | 8.3    | 18 |                                                                                                                                                                                                                        |                                                                                                                                                                                                                                                                                                   |
| Pre         | IL-18   | 691.91          | 977.6  | 18 | Post-1 5hrs vs Post-1 2wks (*)                                                                                                                                                                                         |                                                                                                                                                                                                                                                                                                   |
| Post-1 5hrs |         | 615.81          | 558.5  | 18 |                                                                                                                                                                                                                        |                                                                                                                                                                                                                                                                                                   |
| Post-1 2wks |         | 262.60          | 165.0  | 18 |                                                                                                                                                                                                                        |                                                                                                                                                                                                                                                                                                   |
| Post-2 5hrs |         | 345.02          | 283.6  | 18 |                                                                                                                                                                                                                        |                                                                                                                                                                                                                                                                                                   |
| Post-2 2wks |         | 206.28          | 88.3   | 18 |                                                                                                                                                                                                                        |                                                                                                                                                                                                                                                                                                   |
| Pre         | IL-1α   | 10.73           | 5.7    | 18 | NS                                                                                                                                                                                                                     |                                                                                                                                                                                                                                                                                                   |
| Post-1 5hrs |         | 15.89           | 7.8    | 18 |                                                                                                                                                                                                                        |                                                                                                                                                                                                                                                                                                   |
| Post-1 2wks |         | 11.71           | 8.4    | 18 |                                                                                                                                                                                                                        |                                                                                                                                                                                                                                                                                                   |
| Post-2 5hrs |         | 16.01           | 15.7   | 18 |                                                                                                                                                                                                                        |                                                                                                                                                                                                                                                                                                   |
| Post-2 2wks |         | 16.03           | 11.9   | 18 |                                                                                                                                                                                                                        |                                                                                                                                                                                                                                                                                                   |
| Pre         | IL-5    | 6.30            | 4.5    | 18 | NS                                                                                                                                                                                                                     |                                                                                                                                                                                                                                                                                                   |
| Post-1 5hrs |         | 6.25            | 2.5    | 18 |                                                                                                                                                                                                                        |                                                                                                                                                                                                                                                                                                   |
| Post-1 2wks |         | 6.66            | 4.2    | 18 |                                                                                                                                                                                                                        |                                                                                                                                                                                                                                                                                                   |
| Post-2 5hrs |         | 10.85           | 9.5    | 18 |                                                                                                                                                                                                                        |                                                                                                                                                                                                                                                                                                   |
| Post-2 2wks |         | 5.62            | 3.6    | 18 |                                                                                                                                                                                                                        |                                                                                                                                                                                                                                                                                                   |
| Pre         | IL-7    | 12.81           | 7.8    | 18 | NS                                                                                                                                                                                                                     |                                                                                                                                                                                                                                                                                                   |
| Post-1 5hrs |         | 15.63           | 11.8   | 18 |                                                                                                                                                                                                                        |                                                                                                                                                                                                                                                                                                   |
| Post-1 2wks |         | 13.77           | 9.8    | 18 |                                                                                                                                                                                                                        |                                                                                                                                                                                                                                                                                                   |
| Post-2 5hrs |         | 8.02            | 4.9    | 18 |                                                                                                                                                                                                                        |                                                                                                                                                                                                                                                                                                   |
| Post-2 2wks |         | 17.22           | 14.9   | 18 |                                                                                                                                                                                                                        |                                                                                                                                                                                                                                                                                                   |
| Pre         | IL-9    | 58.78           | 37.1   | 18 | NS                                                                                                                                                                                                                     |                                                                                                                                                                                                                                                                                                   |
| Post-1 5hrs |         | 65.60           | 50.8   | 18 |                                                                                                                                                                                                                        |                                                                                                                                                                                                                                                                                                   |
| Post-1 2wks |         | 80.81           | 72.9   | 18 |                                                                                                                                                                                                                        |                                                                                                                                                                                                                                                                                                   |
| Post-2 5hrs |         | 42.81           | 30.5   | 18 |                                                                                                                                                                                                                        |                                                                                                                                                                                                                                                                                                   |
| Post-2 2wks |         | 60.35           | 40.2   | 18 |                                                                                                                                                                                                                        |                                                                                                                                                                                                                                                                                                   |
| Pre         | IL-10   | 3.54            | 2.8    | 18 | NS                                                                                                                                                                                                                     |                                                                                                                                                                                                                                                                                                   |
| Post-1 5hrs |         | 5.21            | 4.7    | 18 |                                                                                                                                                                                                                        |                                                                                                                                                                                                                                                                                                   |
| Post-1 2wks |         | 4.68            | 4.0    | 18 |                                                                                                                                                                                                                        |                                                                                                                                                                                                                                                                                                   |
| Post-2 5hrs |         | 4.69            | 3.2    | 18 |                                                                                                                                                                                                                        |                                                                                                                                                                                                                                                                                                   |
| Post-2 2wks |         | 3.88            | 4.3    | 18 |                                                                                                                                                                                                                        |                                                                                                                                                                                                                                                                                                   |
| Pre         | IL-13   | 28.00           | 17.6   | 18 | NS                                                                                                                                                                                                                     |                                                                                                                                                                                                                                                                                                   |
| Post-1 5hrs |         | 36.43           | 31.3   | 18 |                                                                                                                                                                                                                        |                                                                                                                                                                                                                                                                                                   |
| Post-1 2wks |         | 31.26           | 22.4   | 18 |                                                                                                                                                                                                                        |                                                                                                                                                                                                                                                                                                   |
| Post-2 5hrs |         | 17.89           | 13.5   | 18 |                                                                                                                                                                                                                        |                                                                                                                                                                                                                                                                                                   |
| Post-2 2wks |         | 25.05           | 21.6   | 18 |                                                                                                                                                                                                                        |                                                                                                                                                                                                                                                                                                   |
| Pre         | MIG     | 163.50          | 128.1  | 18 | NS                                                                                                                                                                                                                     |                                                                                                                                                                                                                                                                                                   |
| Post-1 5hrs |         | 212.56          | 171.0  | 18 |                                                                                                                                                                                                                        |                                                                                                                                                                                                                                                                                                   |
| Post-1 2wks |         | 133.69          | 126.8  | 18 |                                                                                                                                                                                                                        |                                                                                                                                                                                                                                                                                                   |
| Post-2 5hrs |         | 177.42          | 113.1  | 18 |                                                                                                                                                                                                                        |                                                                                                                                                                                                                                                                                                   |
| Post-2 2wks |         | 118.69          | 121.1  | 18 |                                                                                                                                                                                                                        |                                                                                                                                                                                                                                                                                                   |
| Pre         | MIP-1α  | 1.54            | 1.4    | 18 | NS                                                                                                                                                                                                                     |                                                                                                                                                                                                                                                                                                   |
| Post-1 5hrs |         | 5.67            | 10.2   | 18 |                                                                                                                                                                                                                        |                                                                                                                                                                                                                                                                                                   |
| Post-1 2wks |         | 1.77            | 1.5    | 18 |                                                                                                                                                                                                                        |                                                                                                                                                                                                                                                                                                   |
| Post-2 5hrs |         | 2.68            | 2.3    | 18 |                                                                                                                                                                                                                        |                                                                                                                                                                                                                                                                                                   |
| Post-2 2wks |         | 2.34            | 2.8    | 18 |                                                                                                                                                                                                                        |                                                                                                                                                                                                                                                                                                   |
| Pre         | RANTES  | 58.79           | 17.0   | 18 | NS                                                                                                                                                                                                                     |                                                                                                                                                                                                                                                                                                   |
| Post-1 5hrs |         | 79.08           | 37.8   | 18 |                                                                                                                                                                                                                        |                                                                                                                                                                                                                                                                                                   |
| Post-1 2wks |         | 54.84           | 24.5   | 18 |                                                                                                                                                                                                                        |                                                                                                                                                                                                                                                                                                   |
| Post-2 5hrs |         | 74.22           | 35.0   | 18 |                                                                                                                                                                                                                        |                                                                                                                                                                                                                                                                                                   |
| Post-2 2wks |         | 60.46           | 28.3   | 18 |                                                                                                                                                                                                                        |                                                                                                                                                                                                                                                                                                   |



**Table S7. GSEA analysis using differentially expressed genes in *Clec4d<sup>+</sup>Clec4e<sup>+</sup>* monocytes comparing Post-2 and Pre time points.**

| Gene Set | Description                                            | NES     | P Value  | FDR      | Genes                                                                                                                                                                      |
|----------|--------------------------------------------------------|---------|----------|----------|----------------------------------------------------------------------------------------------------------------------------------------------------------------------------|
| mmu05320 | Autoimmune thyroid disease                             | -2.1396 | 0.002451 | 0.048902 | H2-Q6, H2-Q7, H2-K1, H2-Eb1, H2-Ab1, H2-DMa, H2-T23, H2-Q4, H2-T22, Cd40                                                                                                   |
| mmu05416 | Viral myocarditis                                      | -1.9869 | 0.005362 | 0.097804 | H2-Q6, Dmd, H2-Q7, H2-K1, H2-Eb1, H2-Ab1, H2-DMa, H2-T23, H2-Q4, H2-T22                                                                                                    |
| mmu00900 | Terpenoid backbone biosynthesis                        | -1.9622 | <2.2e-16 | 0.077823 | Hmgcr, Zmpste24, Mvk, Fdps, Acat1                                                                                                                                          |
| mmu04962 | Vasopressin-regulated water reabsorption               | -1.8845 | 0.004739 | 0.11042  | Arhgd1b, Dymn12, Rab5b, Dcni1, Dync1l1, Dync1l2, Prkacb, Creb1, Dync1l11, Rab5c                                                                                            |
| mmu04514 | Cell adhesion molecules (CAMs)                         | -1.8411 | 0.002725 | 0.12494  | H2-Q6, H2-Q7, H2-K1, H2-Eb1, Selplg, H2-Ab1, Cadm3, Sell, H2-DMa, Itgb1, H2-T23, H2-Q4, H2-T22                                                                             |
| mmu04672 | Intestinal immune network for IgA production           | -1.7852 | 0.013761 | 0.14842  | H2-Eb1, H2-Ab1, H2-DMa, Map3k14, Cd40                                                                                                                                      |
| mmu05412 | Arrhythmogenic right ventricular cardiomyopathy (ARVC) | -1.6911 | 0.025229 | 0.24552  | Dmd, Tcf7, Ctnna1, Slocsa1, Lef1, Itgb1, Tefl2, Cacnb3                                                                                                                     |
| mmu04612 | Antigen processing and presentation                    | -1.5963 | 0.035714 | 0.2543   | H2-Q6, H2-Q7, H2-K1, Tap2, Iti30, Klrk1, H2-Eb1, Tappp, Cd74, H2-Ab1, H2-DMa, H2-T23, H2-Q4, H2-T22, Pams3, Creb1                                                          |
| mmu00310 | Lysine degradation                                     | -1.5956 | 0.041463 | 0.23665  | Seld1a, Kmi2b, Ash11, Acat1, Ehmt2, Nad2, Kmi2d, Pliod3, Kmi2a, Seld1b                                                                                                     |
| mmu05340 | Primary immunodeficiency                               | -1.5876 | 0.042222 | 0.2284   | Il2rg, Tap2, Cd40, Rfxap, Tap1                                                                                                                                             |
| mmu04625 | C-type lectin receptor signaling pathway               | 2.4507  | <2.2e-16 | <2.2e-16 | Plgs2, Clec4d, Clec4e, Ntkbia, Tnfr1b, Nirp3, Ipr2, Clec4n, Fcer1g, Mapkapk2                                                                                               |
| mmu04621 | NOD-like receptor signaling pathway                    | 2.4526  | <2.2e-16 | <2.2e-16 | Cxcl2, Cxcl3, Ntkbia, Tnf, Iti1b, Nirp3, Ipr2, Ccl2, Cclb, Erbin, Tnfrap3, Casp4, Jun, Gabarap, Vdac2, Tank, Txn1                                                          |
| mmu04064 | NF-kappa B signaling pathway                           | 2.4696  | <2.2e-16 | <2.2e-16 | Cxcl2, Cd4, Plgs2, Cd14, Ntkbia, Tnf, Gadd45b, Iti1b, Bcl2a1b, Tnfrap3, Bcl2a1a, Cflar, Icam1                                                                              |
| mmu04657 | IL-17 signaling pathway                                | 2.4712  | <2.2e-16 | <2.2e-16 | Cxcl2, Cxcl3, Plgs2, Ntkbia, Tnf, Iti1b, Ccl2, Cebp, Fos, Tnfrap3                                                                                                          |
| mmu04620 | Toll-like receptor signaling pathway                   | 2.5526  | <2.2e-16 | <2.2e-16 | Ccl3, Spp1, Cd4, Cd14, Ntkbia, Tnf, Iti1b, Fyn, Map2k3, Jun, Irf2, Myd88, Irak1, Tab2                                                                                      |
| mmu04412 | Lysosome                                               | 2.5714  | <2.2e-16 | <2.2e-16 | Atp6v0c, Ctsd, Ctsb, Ltaf, Ctsf, Psap, Hgsnat, Cd68, Ap3s1, Lamp2, Gns, Atp6v0d2, Ctss, Ctla, Igf2r, Slc11a1, Neu1, Glia, Lgmn, Hexa, Npc1, Tpp1, Atp6v0d1, Lamp1, Atp6v0b |
| mmu05134 | Legionellosis                                          | 2.6797  | <2.2e-16 | <2.2e-16 | Cxcl2, Cxcl3, Cd14, Ntkbia, Tnf, Iti1b                                                                                                                                     |
| mmu05132 | Salmonella infection                                   | 2.7148  | <2.2e-16 | <2.2e-16 | Cxcl2, Ccl3, Cxcl3, Cd4, Cd14, Iti1a, Iti1b, Rab7                                                                                                                          |
| mmu04668 | TNF signaling pathway                                  | 2.8446  | <2.2e-16 | <2.2e-16 | Cxcl2, Cxcl3, Plgs2, Ntkbia, Tnf, Iti1b, Ccl2, Ccrl1, Cebp, Tnfrsf1b, Junb, Socs3, Fos, Tnfrap3, AMy, Cflar, Bcl3, Icam1, Map2k3, Jun                                      |
| mmu04060 | Cytokine-cytokine receptor interaction                 | 2.9309  | <2.2e-16 | <2.2e-16 | Cxcl2, Ccl3, Itim, Cxcl3, Cd4, Tnf, Iti1a, Iti1b, Ccl6, Ccl2, Iti19, Ccrl1, Inhba, Tnfrsf1b, Il1r2, Ccrl1, Gdf15, Il1rap                                                   |

**Table S8. GSEA analysis using differentially expressed genes in *Clec4d<sup>+</sup>Clec4e<sup>+</sup>* monocytes comparing Post-2 and Post-1 time points.**

| Gene Set | Description                                              | NES     | P Value  | FDR      | Genes                                                                                                                                        |
|----------|----------------------------------------------------------|---------|----------|----------|----------------------------------------------------------------------------------------------------------------------------------------------|
| mmu04390 | Hippo signaling pathway                                  | -1.9161 | <2.2e-16 | 0.26287  | Ccnd2, Limd1, Ccnd3, Smad7, Tgfb1, Id2, Tefl2, Lats1, Mob1a, Itgb2, Apc, Mob1b, Ywhaz, Bmpr2, Ppp2ca, Ppp2r1a, Tgfb2                         |
| mmu03018 | RNA degradation                                          | -1.8778 | 0.006873 | 0.18065  | Wdr61, Cnot3, Ddx8, Zcchc7, Cnot1, Cnot2, Dhx36, Tls37, Xrn1, Pan3, Exosc3, Pkl                                                              |
| mmu01522 | Endocrine resistance                                     | -1.7216 | 0.012324 | 0.43833  | Ncor1, Rps6kb1, Bcl2, Cdkn1b, Map2k1, Adcy7, Raf1, Mapk14, Bad, Notch2, Bax, Braf, Plk3cb                                                    |
| mmu04261 | Adrenergic signaling in cardiomyocytes                   | -1.6814 | 0.023853 | 0.44225  | Plk3cg, Plk3r6, Bcl2, Camk2d, Gnai3, Slocsa1, Adcy7, Mapk14, Adrb2, Creb1, Ppp2ca, Tom3, Ppp2r1a, Alp1b1, Atf2, Alp2a2, Gnaq                 |
| mmu04650 | Natural killer cell mediated cytotoxicity                | -1.6291 | 0.024254 | 0.50073  | Klrk1, Klrk2, Klrk1, Prf1, Fyn, Cd48, Itgal, Kira9, Kira7, Ifnar2, Prkcb, Kira8, Map2k1, Gzmb, Hcst, Raf1, H2-D1, Itgb2, Ptpn6, Nfatc1, Ncr1 |
| mmu04550 | Signaling pathways regulating pluripotency of stem cells | -1.622  | 0.027273 | 0.43463  | Meis1, Rlf1, Tcf3, Skil, Map2k1, Id2, Raf1, Mapk14, Apc, Bmpr2                                                                               |
| mmu04012 | ErbB signaling pathway                                   | -1.5862 | 0.041812 | 0.46751  | Cbl, Nck1, Stat5b, Rps6kb1, Cdkn1b, Prkcb, Map2k1, Camk2d, Raf1, Crkl                                                                        |
| mmu00280 | Valine, leucine and isoleucine degradation               | -1.5715 | 0.033088 | 0.44709  | Hadhb, Aacs, Hihabd, Hmgcs1                                                                                                                  |
| mmu04928 | Parathyroid hormone synthesis, secretion and action      | -1.1361 | 0.30319  | 0.67325  | Akap3, Mel2d, Mel2c, Bcl2, Prkcb, Map2k1, Gnai3, Adcy7, Lrp6, Raf1, Mel2a, Arhgef11                                                          |
| mmu04392 | Hippo signaling pathway                                  | -1.1288 | 0.34862  | 0.67493  | Limd1, Lats1, Mob1a, Mob1b                                                                                                                   |
| mmu04657 | IL-17 signaling pathway                                  | 2.5785  | <2.2e-16 | <2.2e-16 | Cxcl2, Ntkbia, Plgs2, Cxcl3, Ccl2, Tnf, Tnfrap3, Iti1b                                                                                       |
| mmu05143 | African trypanosomiasis                                  | 2.6533  | <2.2e-16 | <2.2e-16 | Hba-a1, Hbb-bs, Hba-a2, Tnf, Hbb-bt, Iti1b, Icam1, Fas                                                                                       |
| mmu04621 | NOD-like receptor signaling pathway                      | 2.6624  | <2.2e-16 | <2.2e-16 | Cxcl2, Ntkbia, Ipr2, Cxcl3, Nirp3, Ccl2, Txn1, Tnf, Tnfrap3, Iti1b, Nampt, Ntkbia, Gabarap, Tank, Hsp90ab1, Ptpn11                           |
| mmu04640 | Hematopoietic cell lineage                               | 2.6752  | <2.2e-16 | <2.2e-16 | H2-Eb1, H2-Aa, Iti1a, Cd14, H2-Ab1, Tnf, Iti1b, Itgb3, Cd24a, Cd9                                                                            |
| mmu05140 | Leishmaniasis                                            | 2.7002  | <2.2e-16 | <2.2e-16 | Ntkbia, Plgs2, Marcks1, H2-Eb1, H2-Aa, Iti1a, H2-Ab1, Tnf, Iti1b, Ntkbib                                                                     |
| mmu05132 | Salmonella infection                                     | 2.7635  | <2.2e-16 | <2.2e-16 | Cxcl2, Ccl3, Cxcl3, Iti1a, Cd14, Ccl4, Iti1b, Rac1, Plekhm2, Actg1                                                                           |
| mmu05134 | Legionellosis                                            | 2.8207  | <2.2e-16 | <2.2e-16 | Cxcl2, Ntkbia, Cxcl3, Cd14, Tnf, Iti1b, Arf1                                                                                                 |
| mmu04668 | TNF signaling pathway                                    | 2.886   | <2.2e-16 | <2.2e-16 | Cxcl2, Ntkbia, Plgs2, Cxcl3, Ccl2, Tnf, Tnfrap3, Iti1b, Junb, Atf4, Icam1                                                                    |
| mmu04060 | Cytokine-cytokine receptor interaction                   | 2.893   | <2.2e-16 | <2.2e-16 | Cxcl2, Ccl3, Cxcl3, Iti1a, Ccl2, Iti19, Ccl6, Iti1m, Tnf, Ccl4, Ccr1, Iti1b, Pppb, Ccr7, Cxcl16, Tnfrsf1b, P4, Fas, Gdf15, Cxcr4             |
| mmu04064 | NF-kappa B signaling pathway                             | 3.1212  | <2.2e-16 | <2.2e-16 | Cxcl2, Ntkbia, Plgs2, Gadd45b, Bcl2a1b, Cd14, Tnf, Ccl4, Bcl2a1a, Tnfrap3, Iti1b, Icam1, Ube21, Bcl2a1d                                      |

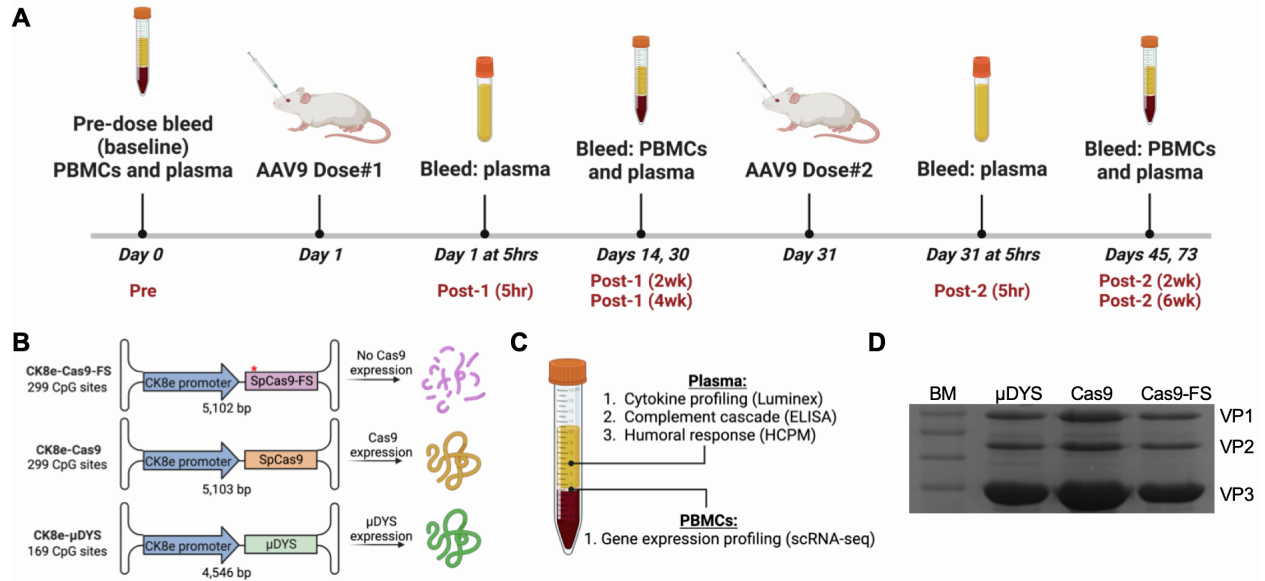

**Figure S1. Experimental timeline to characterize AAV9-mediated immune responses in dual AAV dosed *mdx* mice.**

**A)** Schematic timeline to study AAV9-induced immune responses in *mdx* mice. n=9 male and n=9 female mice (3 mice per AAV9 vector) dosed at  $\sim 1.16 \times 10^{14}$  vg/kg. Created with BioRender.com.

**B)** Schematic of AAV vectors used to deliver Cas9-FS, Cas9, and μDYS. The asterisks (\*) for Cas9-FS indicates a frameshift mutation located near the N-terminus of the Cas9 coding sequence, generating a pre-mature stop codon. Created with BioRender.com.

**C)** Plasma samples were used to assess cytokine responses (Luminex), complement levels (ELISAs), and antibody responses via high content protein microarray (HCPM). PBMCs were characterized by scRNA-seq. Created with BioRender.com.

**D)** Coomassie stained SDS-PAGE of the recombinant AAV9-μDYS, AAV9-Cas9, and AAV9-Cas9-FS vectors used in the study.  $1.0 \times 10^{12}$  vg of AAV was loaded per lane.



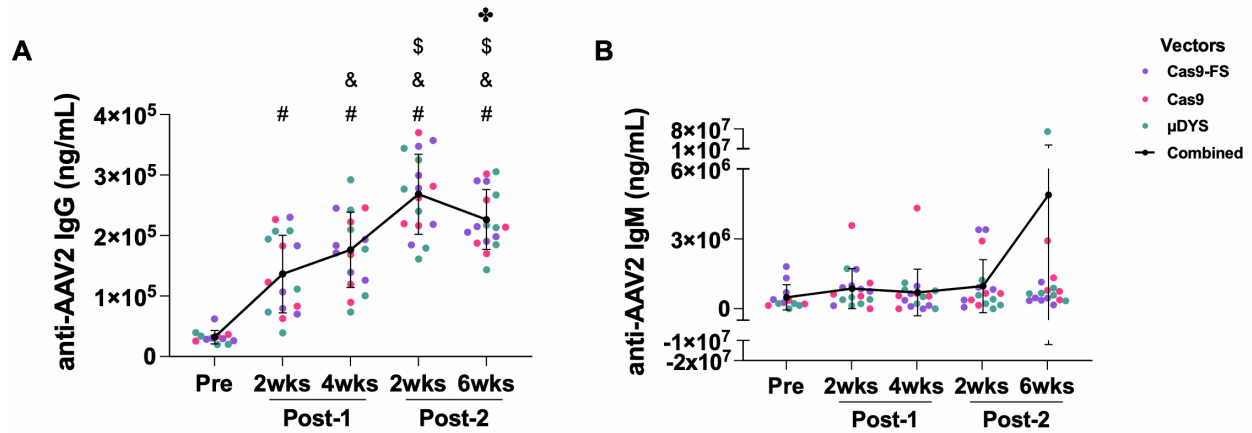

**Figure S2. Assessment of anti-AAV2 antibody responses using a high content protein microarray (HCPM).**

**A-B)** anti-AAV2 IgG and IgM responses were measured via high content protein microarray (HCPM) from male (n=9) and female (n=8) *mdx* mice at indicated time points. The key indicates the vector that was dosed and the black line represents AAV9-treated groups combined by time point, which was used for multiple comparison statistical analysis. Error bars for all HCPM graphs represent standard deviation. Symbols above time points are used to represent statistical significance, in which  $p < 0.05$ , for time points compared to: (#) Pre, (&) Post-1 (2 weeks), (\$) Post-1 (4 weeks), and (♣) Post-2 (2 weeks). The data and levels of statistical significance between time point comparisons are available in Tables S1 and S2.

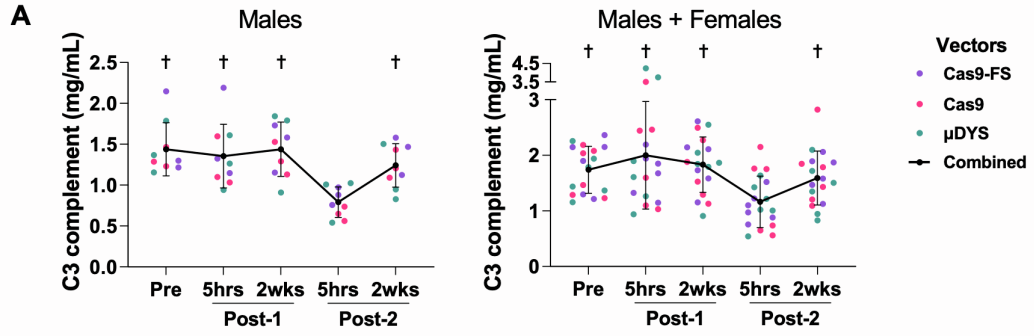

**B**

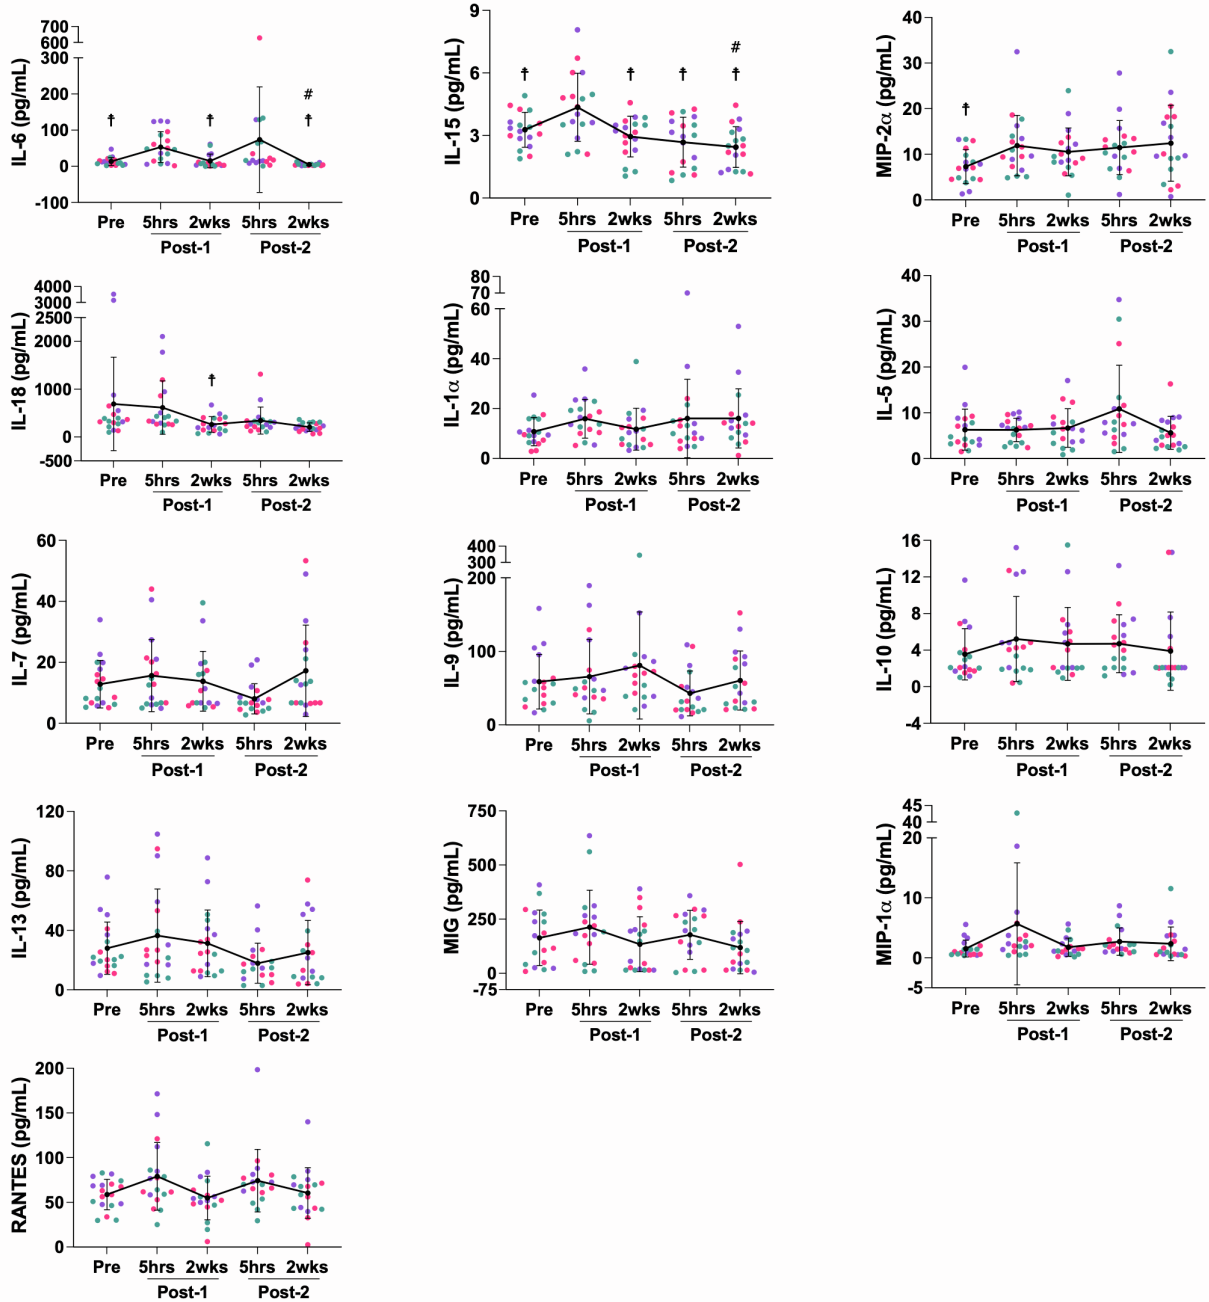

**Figure S3. Complement C3 levels in male and female *mdx* mice and remaining cytokine responses in AAV double-dosed mice.**

**A)** Plasma from *mdx* mice was evaluated by ELISA for levels of complement C3. Left graph shows (n=9 males) and right graph shows n=9 females and n=9 males. C3 graph of females only (n=9) is shown in Figure 2A. The key indicates the vector that was dosed and the black line represents AAV9-treated groups combined by time point, which was used for multiple comparison statistical analysis. Error bars for all graphs represent standard deviation. Symbols above time points are used to represent statistical significance, in which  $p < 0.05$ , for time points compared to (†) Post-2 (5 hours). The data and levels of statistical significance between time point comparisons are available in Tables S3 and S4.

**B)** Levels of immunomodulatory analytes measured by Luminex ProcartaPlex, n=9 males and n=9 females. Symbols above time points are used to represent statistical significance, in which  $p < 0.05$ , for time points compared to: (#) Pre and (†) Post-1 (5 hours). The data and levels of statistical significance between time point comparisons are available in Tables S5 and S6.

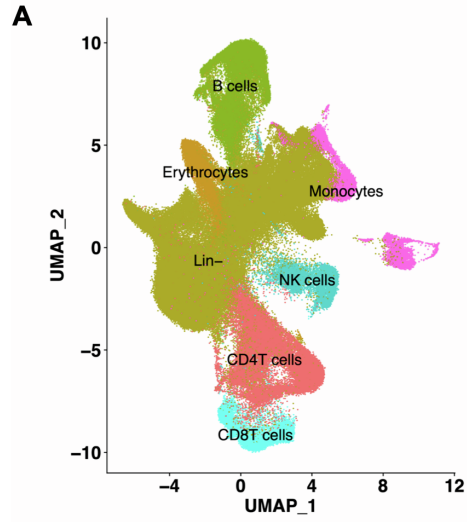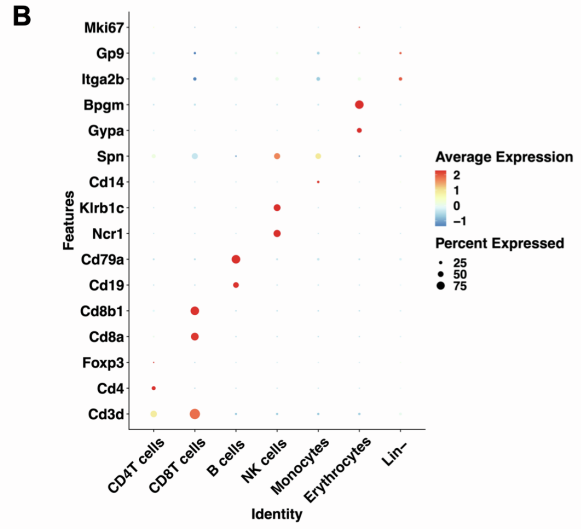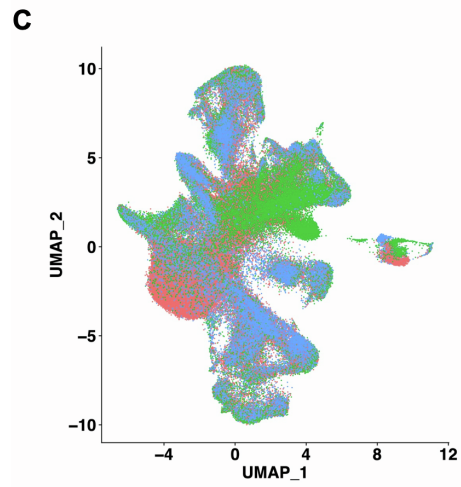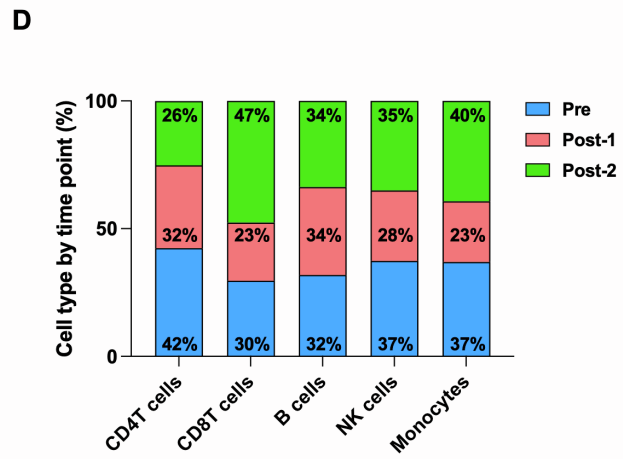

**Figure S4. PBMC single-cell classification for AAV9 double-dosed *mdx* mice.**

**A)** Uniform Manifold Approximation and Projection (UMAP) of main immune cell types:

T cells, B cells, NK cells, and Monocytes.

**B)** Dot plot of gene expression for canonical immune cell populations. Color is scaled by average expression and the dot size is proportional to the percent of cells expressing the respective gene.

**C)** Uniform Manifold Approximation and Projection (UMAP) color coded by time point before and after AAV dosing. Pre (blue), Post-1 (pink) and Post-2 (green).

**D)** Bar graph shows the percentage of T cells, B cells, NK cells and monocytes by time point. Pre (blue), Post-1 (pink) and Post-2 (green).

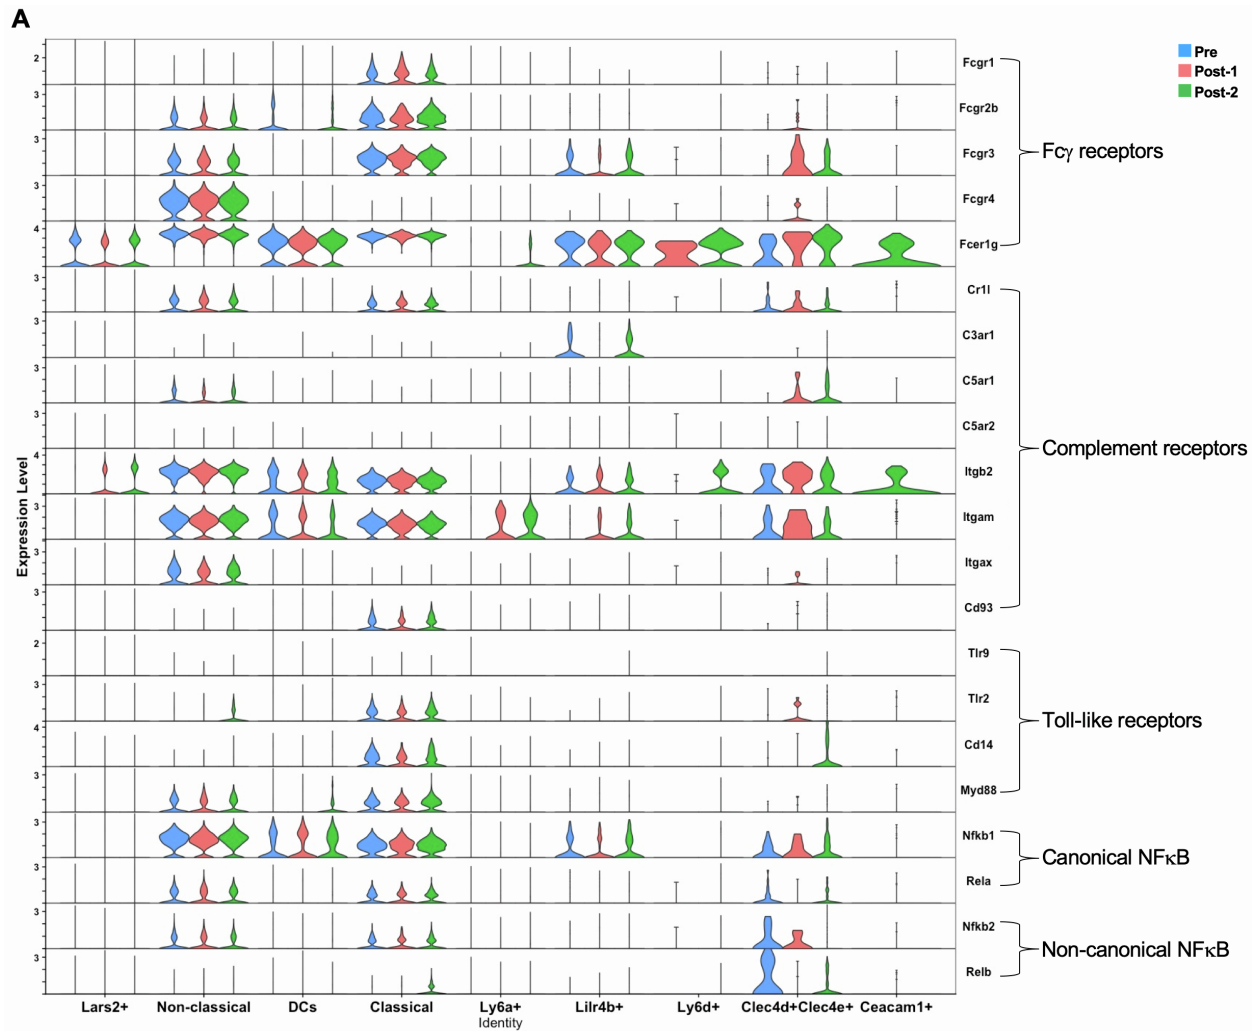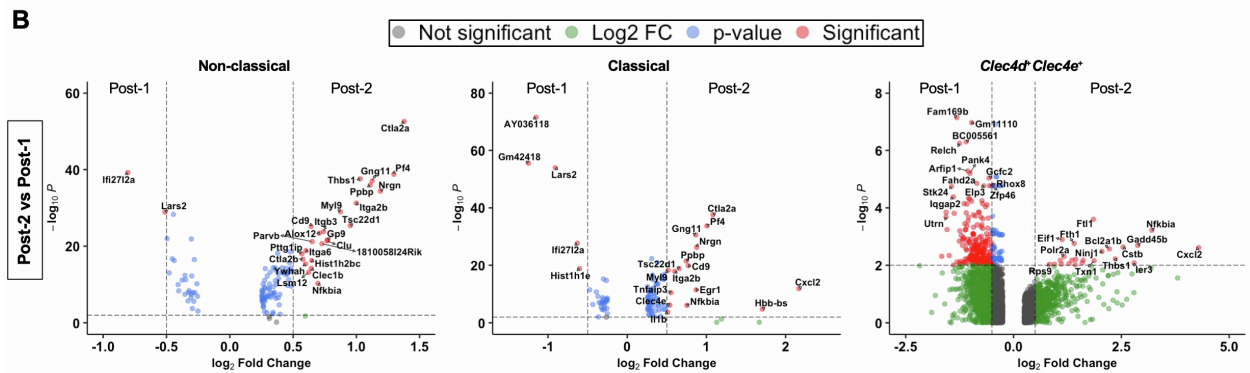



**Figure S5. Differential gene expression among monocyte sub-populations.**

**A)** Stacked violin plot of Fc $\gamma$ Rs, complement receptors, TLRs, canonical and non-canonical NF- $\kappa$ B gene expression in all monocyte sub-populations.

**B)** Volcano plots of classical, non-classical and *Clec4d*<sup>+</sup>*Clec4e*<sup>+</sup> monocytes showing differentially expressed genes between Post-2 (2wk) and Post-1 (2wk). Significantly up- and down-regulated genes contain a  $\text{Log}_2(\text{Fold Change}) > 0.5$  or  $\text{Log}_2(\text{Fold Change}) < -0.5$  and  $-\text{Log}_{10}(\rho\text{-value}) > 2.0$ .
